# Supplementary material for: Repurposing tRNAs for nonsense suppression
Source: PubMed Central journal article supplement (PMC8219837; doi:10.1038/s41467-021-24076-x), 2021-06-22
Supplement: 41467_2021_24076_MOESM1_ESM.pdf [file 41467_2021_24076_MOESM1_ESM.pdf]

## SUPPLEMENTARY DATA

### Repurposing tRNAs for nonsense suppression

Suki Albers<sup>1</sup>, Bertrand Beckert<sup>1</sup>, Marco Matthies<sup>2</sup>, Chandra Sekhar Mandava<sup>3</sup>, Raphael Schuster<sup>4</sup>, Carolin Seuring<sup>5</sup>, Maria Riedner<sup>4</sup>, Suparna Sanyal<sup>3</sup>, Andrew E. Torda<sup>2</sup>, Daniel N. Wilson<sup>1</sup>, Zoya Ignatova<sup>1\*</sup>

<sup>1</sup>Institute of Biochemistry and Molecular Biology, University of Hamburg, Hamburg, Germany.

<sup>2</sup>Center for Bioinformatics, University of Hamburg, Hamburg, Germany.

<sup>3</sup>Department of Cell and Molecular Biology, Uppsala University, Uppsala, Sweden.

<sup>4</sup>Institute of Organic Chemistry, University of Hamburg, Hamburg, Germany.

<sup>5</sup>Center for Structural and Systems Biology, Hamburg, Germany.

\*Correspondence to: Zoya Ignatova, email: [zoya.ignatova@uni-hamburg.de](mailto:zoya.ignatova@uni-hamburg.de)

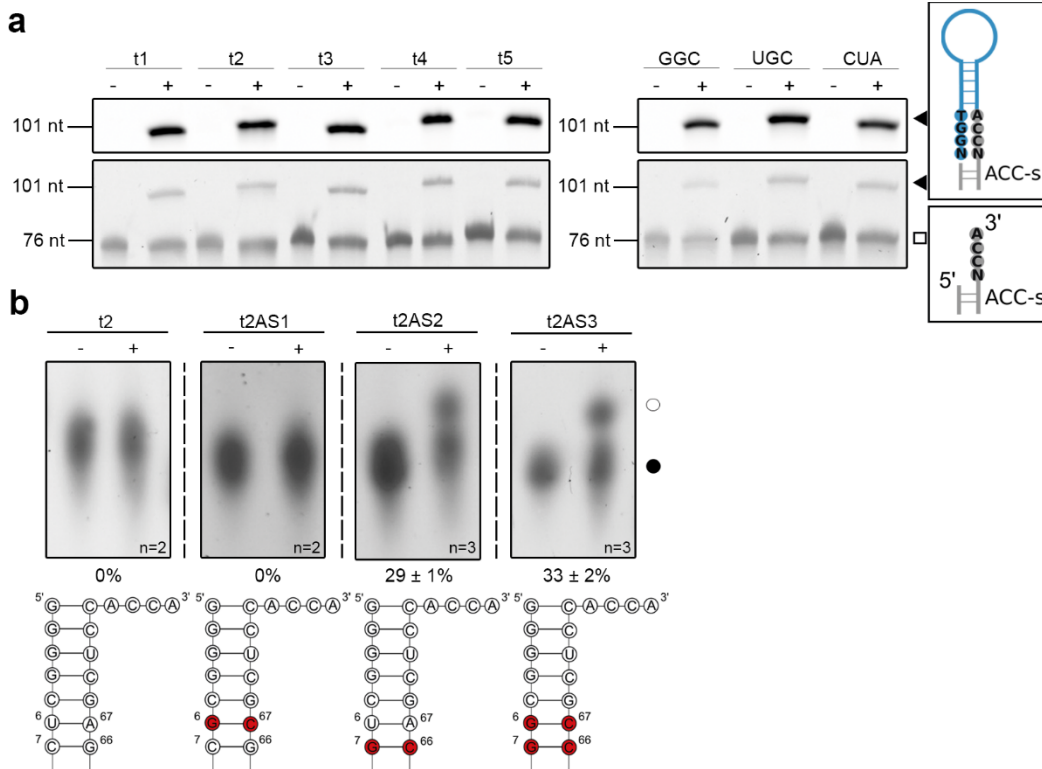

**Supplementary Fig. 1. Probing the 3'NCCA intact ends and aminoacylation of the tRNA designs.** (a) t1-t5 tRNA variants contain similar fractions of intact single-stranded 3'-CCA termini – the prerequisite for aminoacylation. The single-stranded 3'-CCA ends at the end of the acceptor stem (ACC-s) were probed with a Cy3-labeled hairpin oligonucleotide (blue in the schematic) with a complementary 5'-TGGN-3' overhang (+) and compared to *in vitro* transcribed tRNAs (-). tRNAs with ligated oligonucleotide (◀, 101 nt in size) migrate slower than the unligated tRNAs (□, 76 nt in size). tRNAs were detected by fluorescence (upper panel) or SYBR™ Gold Nucleic Acid Stain (lower panel). GGC and UGC denote the anticodon of two natural tRNA<sup>Ala</sup> isoacceptors and CUA is tRNA<sup>Ala</sup>(GGC) with exchanged anticodon to decode UAG stop codon. Note that in all samples the oligonucleotide ligates only to a fraction of the tRNAs, i.e. such with intact 3'-CCA ends (lower gel); tRNAs with aberrant ends (i.e. N+1 ends as commonly observed in *in vitro* transcriptions) will appear in the unligated band (lower panel). The experiment serves as a quality check and hence, was performed as a single experiment. (b) Aminoacylation of t2 is restored by a single base pair exchange within the acceptor stem. Aminoacylation with Ala catalyzed by *E. coli* AlaRS (+) compared to non-aminoacylated *in vitro* transcribed tRNAs (-). Acylated tRNAs (○) migrate slower compared to non-acylated tRNAs (●). Aminoacylation level are means ± s.d. (n, biologically independent experiments for each designated tRNA). Nucleotide substitutions in the acceptor stem (AS) of t2 are highlighted in red. A single base pair substitution in t2 (C<sub>7</sub>-G<sub>66</sub> to G<sub>7</sub>-C<sub>66</sub>) in t2AS2 raises the aminoacylation level to that of the native tRNA<sup>Ala</sup> (Fig. 2). Note that both successive changes in t2AS3 render the acceptor stem equal to the acceptor stem of t1 (Supplementary Table 1). Source data are provided as a Source Data file.

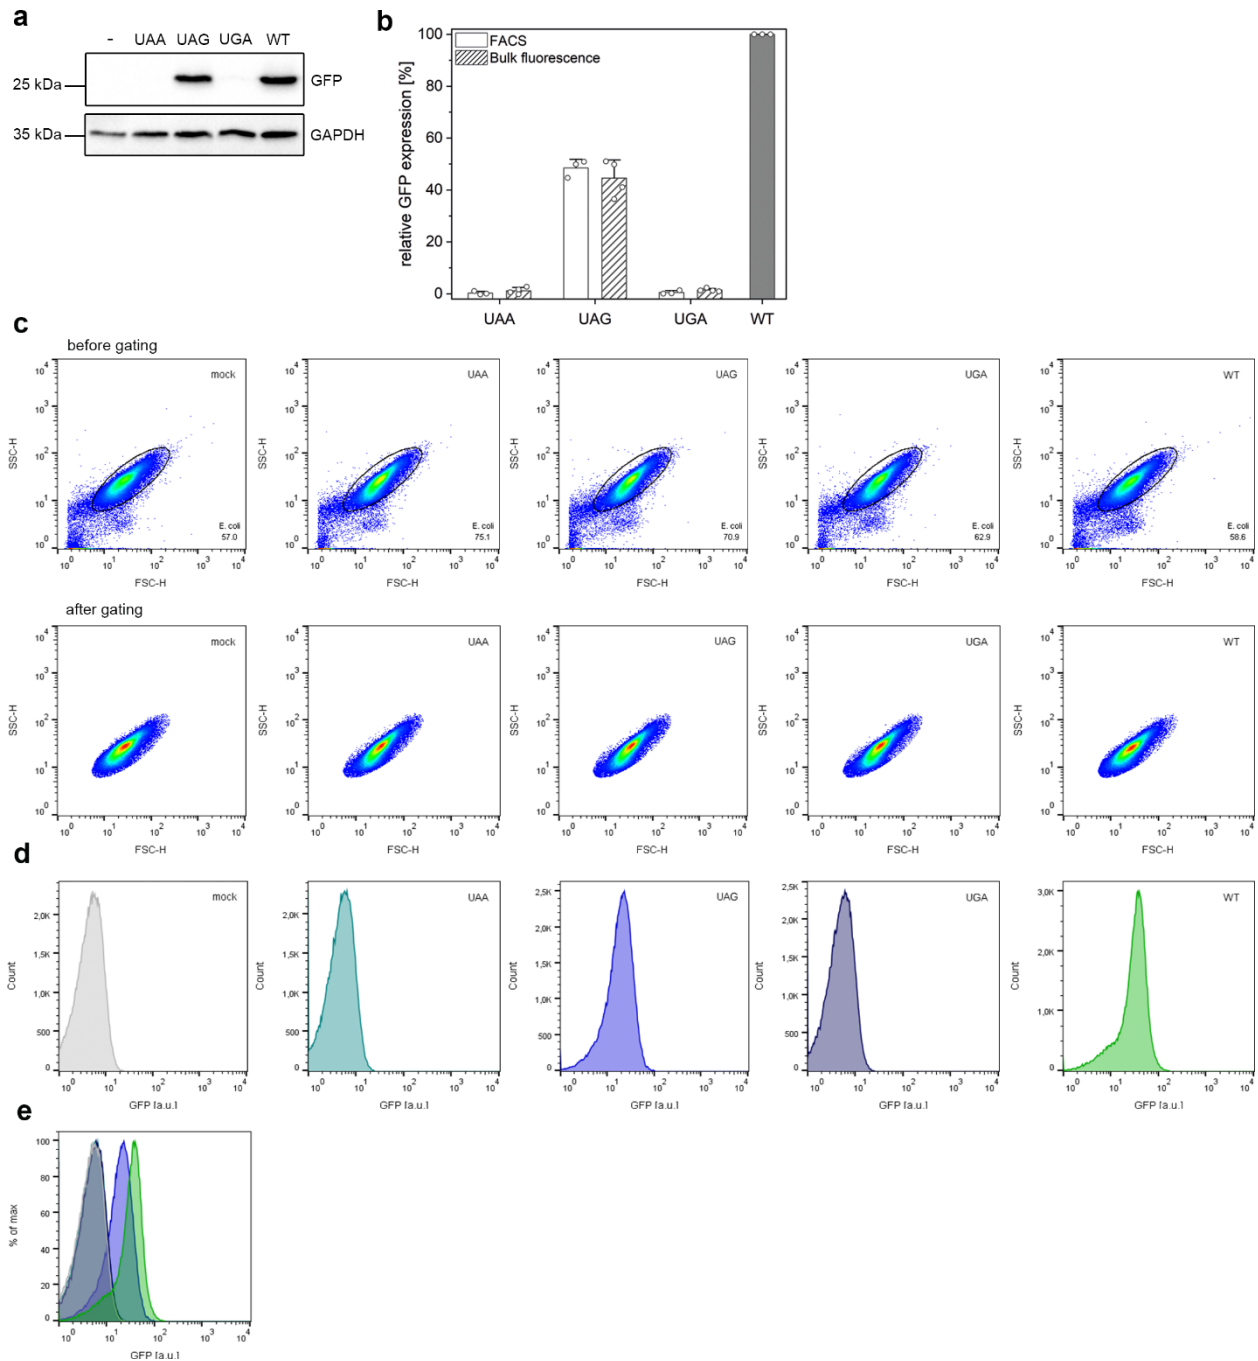

**Supplementary Fig. 2. *E. coli* XL1-blue cells express an endogenous suppressor tRNA *supE44* decoding UAG codons.** (a,b) Endogenous readthrough in XL1-blue cells tested with UAA-, UAG- and UGA-containing GFP variant and detected by immunoblotting (a) or bulk fluorescence and flow cytometry (b). A representative immunoblot is presented in panel a (n=9 biologically independent experiments). -, mock transformation. Bulk fluorescence and flow cytometry signals were normalized to the expression of wildtype GFP (wt, dark gray) whose expression was set to 100%. Data are means  $\pm$  s.d. for flow cytometry (n=3 biologically

independent experiments) and bulk fluorescence (n=4 biologically independent experiments). **(c)** Representative flow cytometry plots showing side scatter (SSC-H) vs. forward scatter (FSC-H) used to gate mock transformed bacterial sample. The same gate was applied to all samples within one biological replicate. Flow cytometry data are represented as pseudocolor plots. **(d)** Representative GFP fluorescence histograms from the gated populations in panel c. **(e)** Overlay of the representative histograms from panel d. Source data are provided as a Source Data file.

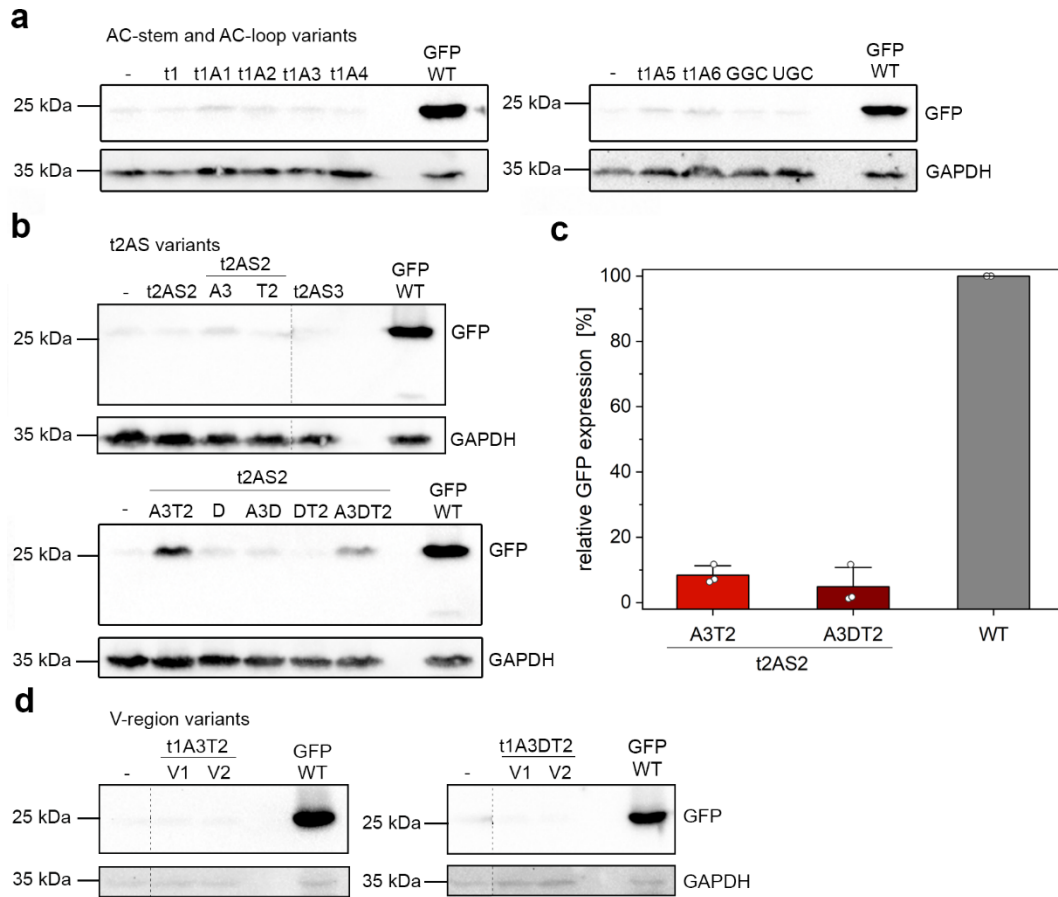

**Supplementary Fig. 3. Suppression efficiency of various tRNA designs in *E. coli* XL1-blue determined by readthrough of UGA-containing GFP.** (a) Representative immunoblot (n=2) of suppression of t1 and its anticodon-edited variants t1A<sub>i</sub>. As control, native tRNA<sup>Ala</sup> isoacceptors GGC and UGC which do not pair to the UGA codon were used. -, mock transformation. (b, c) *In vivo* suppression efficiency of t2AS2, t2AS3 and anticodon-, TΨC- and/or D-region-edited t2AS variants tested in *E. coli* expressing an UGA-containing GFP variant monitored by immunoblotting (b), or bulk fluorescence (c). Representative immunoblots are present in panel b (n=3 biologically independent experiments); -, mock transformation. The bulk fluorescence in panel c was normalized to the expression of wildtype GFP (wt, dark gray) whose expression was set to 100%. Data are means ± s.d (n=3 biologically independent experiments). (d) Representative immunoblot (n=2) of suppression of the V-region-extended variants of t1A3T2 and t1A3DT2. -, mock transformation. Dashed vertical lanes (b, d) denote excised lanes with samples unrelated to this experiment. Source data are provided as a Source Data file.

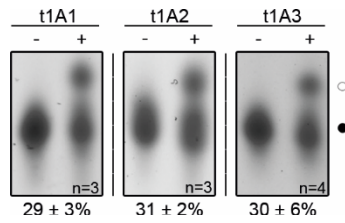

**Supplementary Fig. 4. Anticodon-editing does not affect aminoacylation levels.** Aminoacylation with Ala catalyzed by *E. coli* AlaRS (+) compared to non-aminoacylated *in vitro* transcribed tRNAs (-). Aminoacyl-tRNAs (○) migrate slower compared to non-acylated tRNAs (●). Aminoacylation level are means ± s.d. (n, biologically independent experiments for each tRNA). Nucleotide substitutions were performed in the anticodon stem and loop of t1 (Fig. 3a). Source data are provided as a Source Data file.

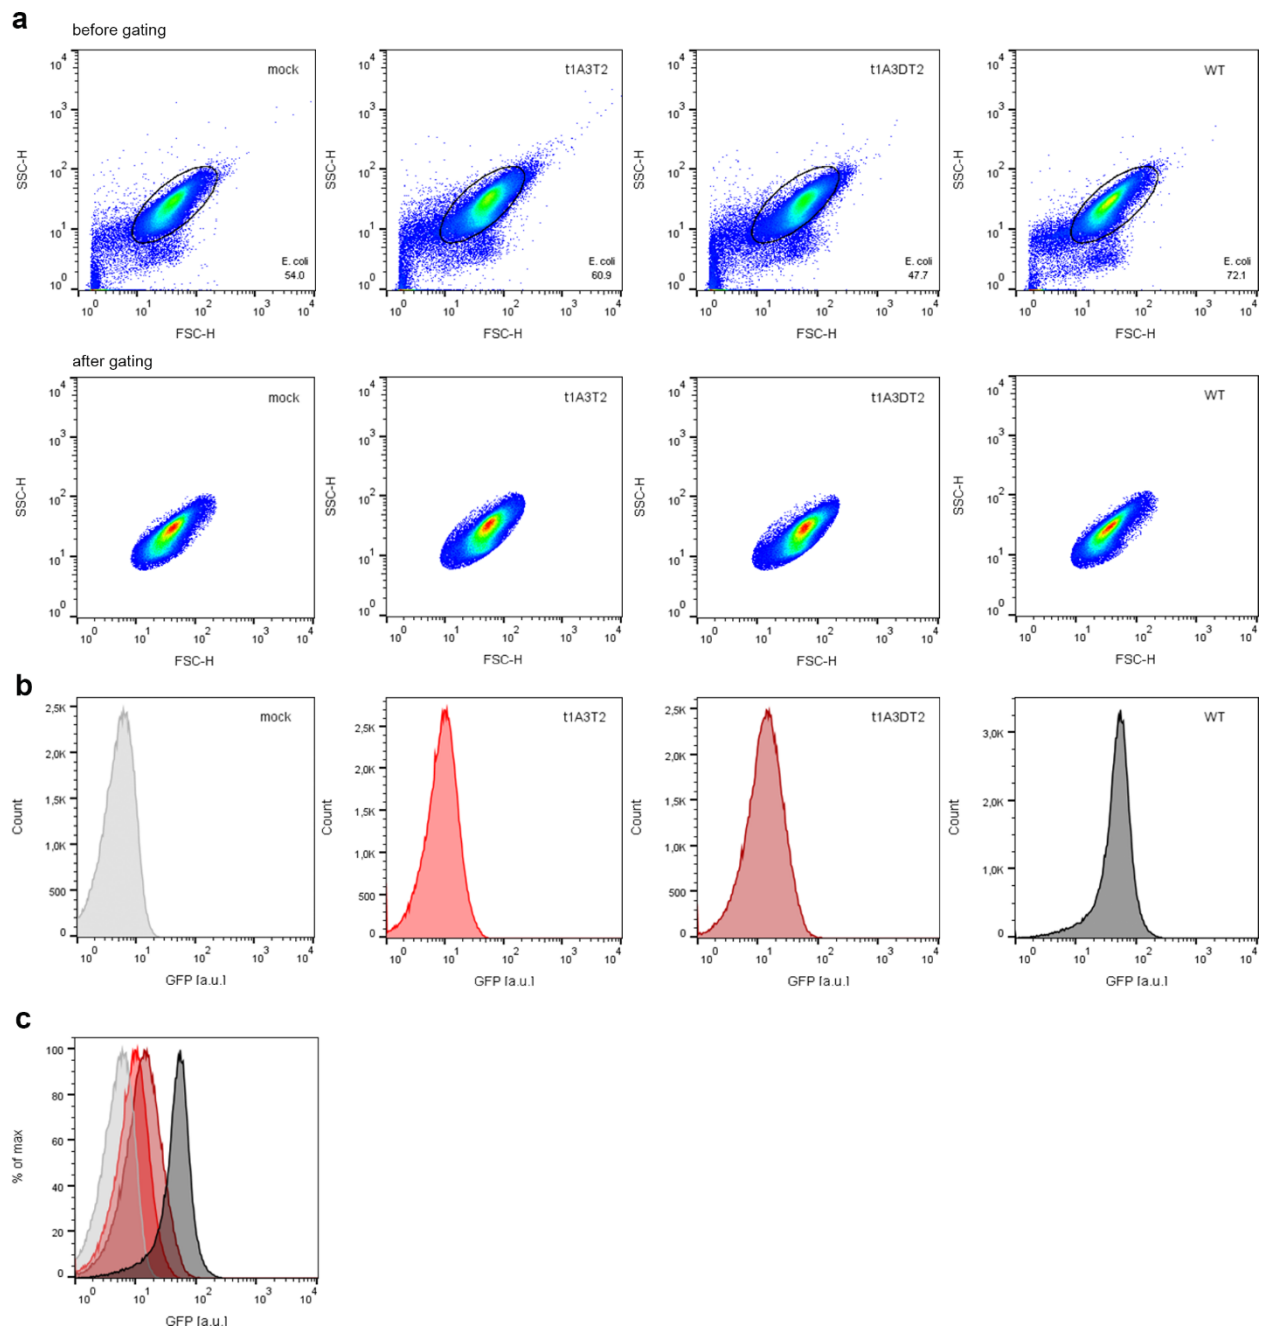

**Supplementary Fig. 5. Representative example of gating of the flow cytometry data to Figure 3d.** (a) Representative flow cytometry plots showing side scatter (SSC-H) vs forward scatter (FSC-H) used to gate intact bacteria in the mock transformed sample. The same gate was applied to all samples within one biological replicate. Flow cytometry data are represented as pseudocolor plots. (b) Representative GFP fluorescence histograms from the gated populations in panel a. (c) Overlay of the representative histograms from panel b. Source data are provided as a Source Data file.

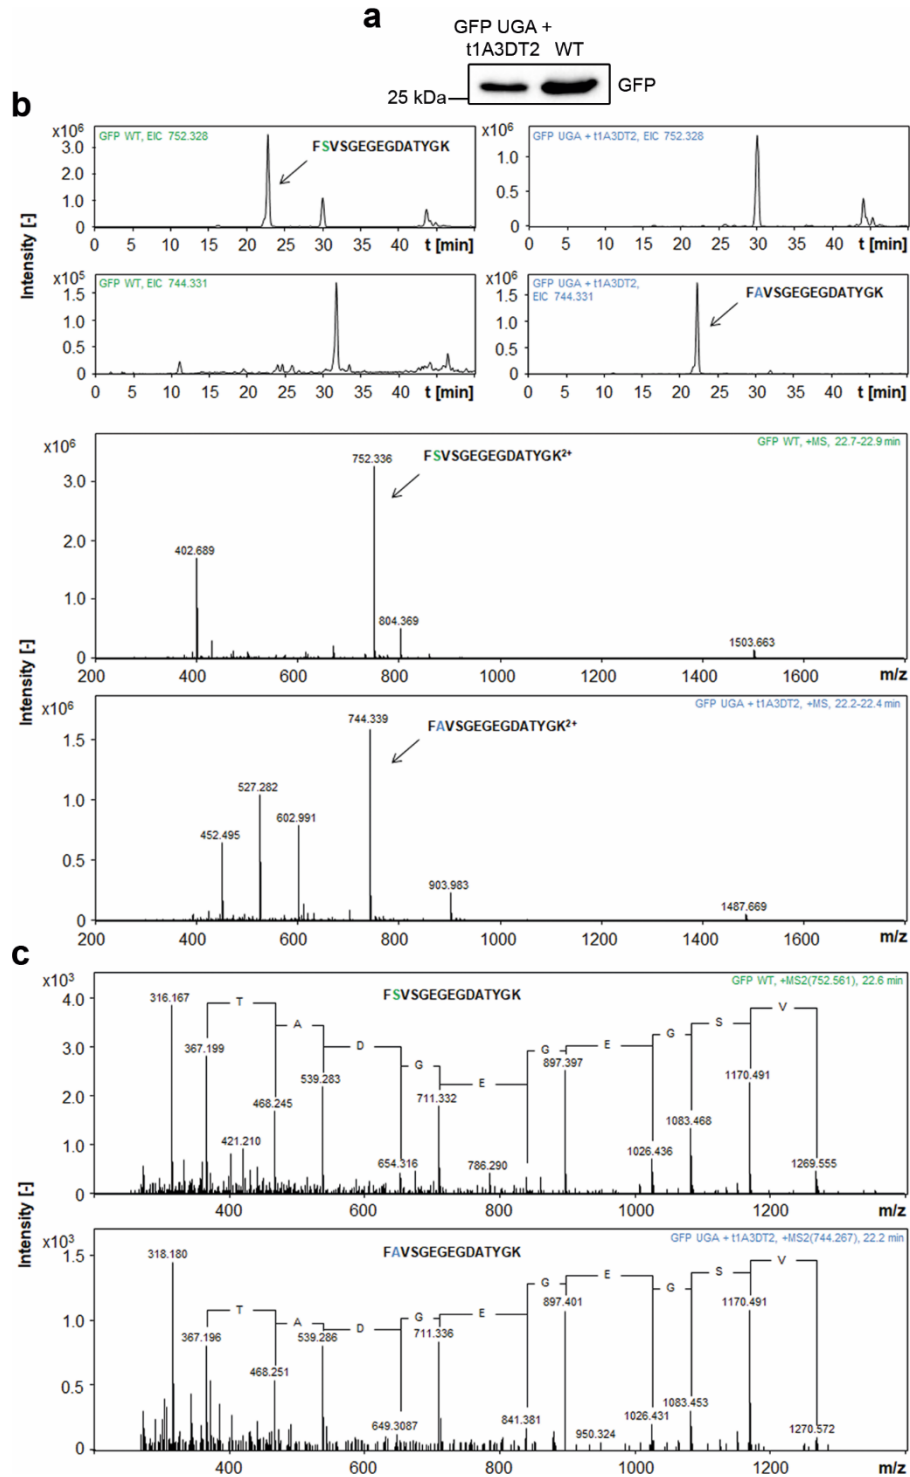



acid at the UGA stop codon. Extracted Ion Chromatograms (EICs) of  $m/z$  752.328 and 744.331, corresponding to the GFP-derived peptides. Wildtype GFP amino acid (Ser) is marked in green, the UGA-containing GFP variant readthrough by t1A3DT2 (Ala) in blue. At 22.8 min retention time the intensive  $m/z$ -signal of 752.336 corresponds to double-protonated and double-charged GFP-derived peptide **F**SVSGEGEGDATY**G**K. At 22.3 min retention time an intensive  $m/z$ -signal of 744.339 corresponds to double-protonated and double-charged GFP-derived peptide **F**AVSGEGEGDATY**G**K. (c) MS/MS-spectra. The mass difference of the precursors  $m/z$  752.561 and  $m/z$  744.267 corresponds to Ser (wildtype, green) to Ala (stop-codon incorporated amino acid, blue) exchange. The experiment serves as quality check and hence performed as a single experiment.

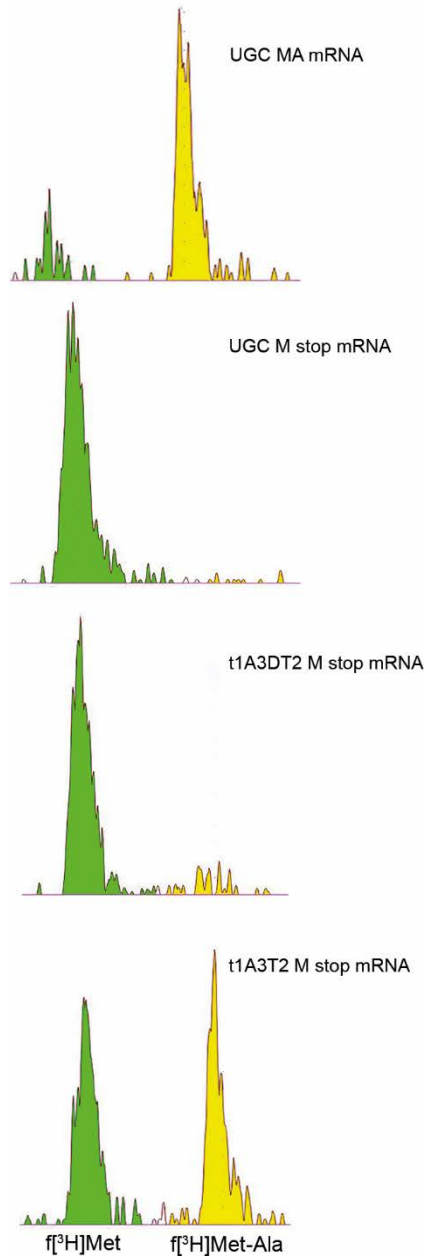

**Supplementary Fig. 7. Dipeptide formation with t1A3T2 and t1A3DT2 suppressor tRNAs.**

RP HPLC chromatogram separating mono- ( $[^3\text{H}]\text{Met}$ , green) and dipeptides ( $[^3\text{H}]\text{Met-Ala}$ , yellow). Dipeptide formation of t1A3T2 and t1A3DT2 compared to wildtype  $\text{tRNA}^{\text{Ala}}(\text{UGC})$  using either Met-Ala-stop(UAA) (MA) or with Met-stop(UGA) (M stop) mRNAs as templates.

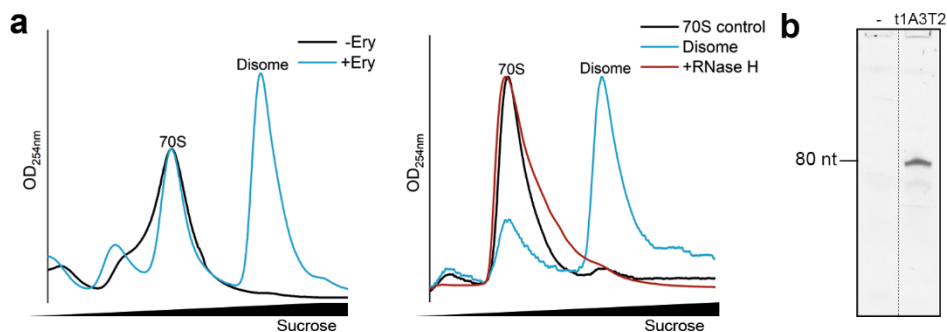

**Supplementary Fig. 8. Isolation of t1A3T2 from XL1-blue cells and generation of 70S-UGA complexes.** (a) Analytical sucrose density (15-60%) gradient profiles of the *in vitro* translation of the 2x ErmCL UGA construct (left panel) performed in the absence (black) or presence of 10  $\mu$ M erythromycin (Ery; blue) and of the treatment of disomes (right panel) in the absence (blue) or presence of RNase H (red). Isolated 70S monosomes (black) were used as control. RNase H was used to convert disomes into monosomes to avoid orientation bias in the cryo-EM analysis. Source data are provided as a Source Data file. (b) Affinity purified t1A3T2 of total RNA isolated from mock transformed cells (-) or XL1-blue cells transformed with pBST NAV2 t1A3T2-tRNA on denaturing PAGE. A biotinylated DNA oligonucleotide complementary to the 3'-end of t1A3T2 was used for the affinity purification. The experiment serves as a quality check and hence, it was performed as a single experiment. Dashed vertical lanes denote the place of excision of lanes with samples unrelated to this experiment. Source data are provided as a Source Data file.

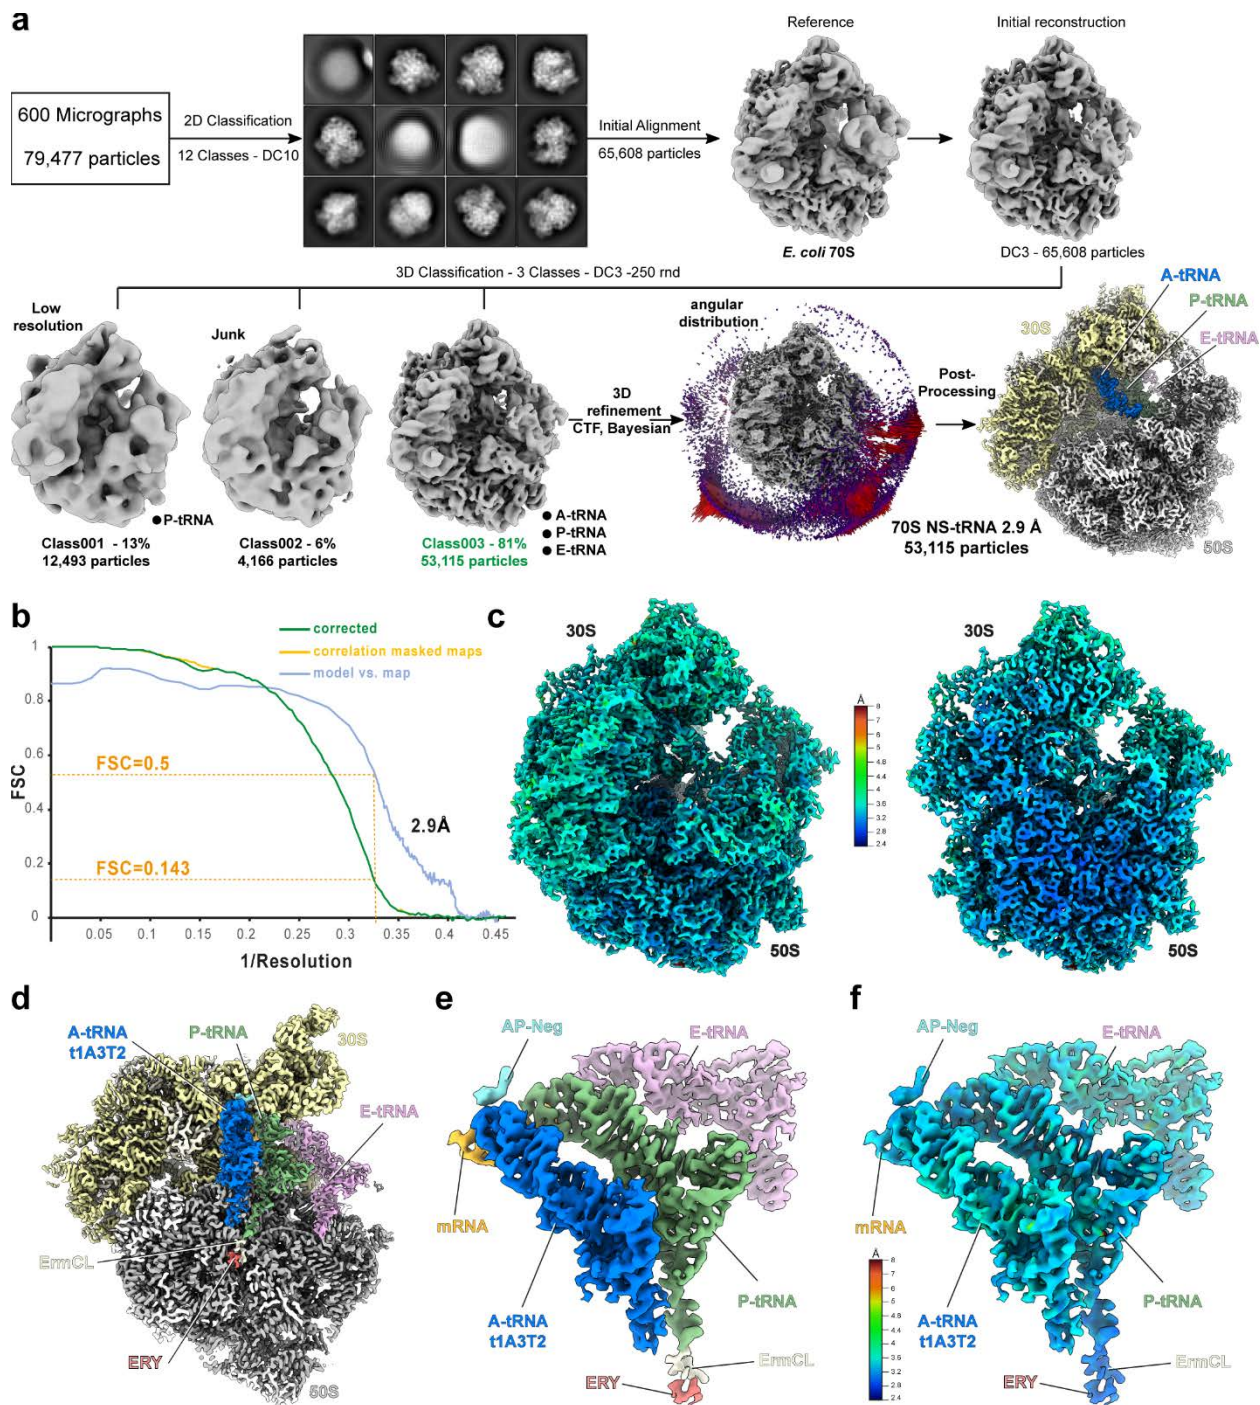

**Supplementary Fig. 9. Cryo-EM reconstruction and molecular model of the t1A3T2-tRNA decoding UGA on the ribosome.** (a) Sorting scheme for the cryo-EM reconstruction of the t1A3T2-UGA-AP-Neg-70S complex. (b) Fourier shell correlation (FSC) curves (corrected, green; correlation masked map, yellow and map vs. model, blue) of the final reconstruction of the t1A3T2-UGA-AP-Neg-70S complex indicating an average resolution of 2.9 Å at FSC<sub>0.143</sub>. (c) Cryo-EM map of the t1A3T2-UGA-AP-Neg-70S complex colored according to local resolution. (d) Overview

of the ErmCL-stalled ribosomal complex with 30S (yellow), 50S (grey), A-tRNA (blue), P-tRNA (green), E-tRNA (pink), ErmCL (beige) and erythromycin (ERY, red). (e) Segmented densities for the A-tRNA (blue), P-tRNA (green), E-tRNA (pink), AP-Neg (cyan), mRNA (orange), erythromycin (ERY, red) and the ErmCL-nascent chain (beige). (f), As (d), but colored according to local resolution.



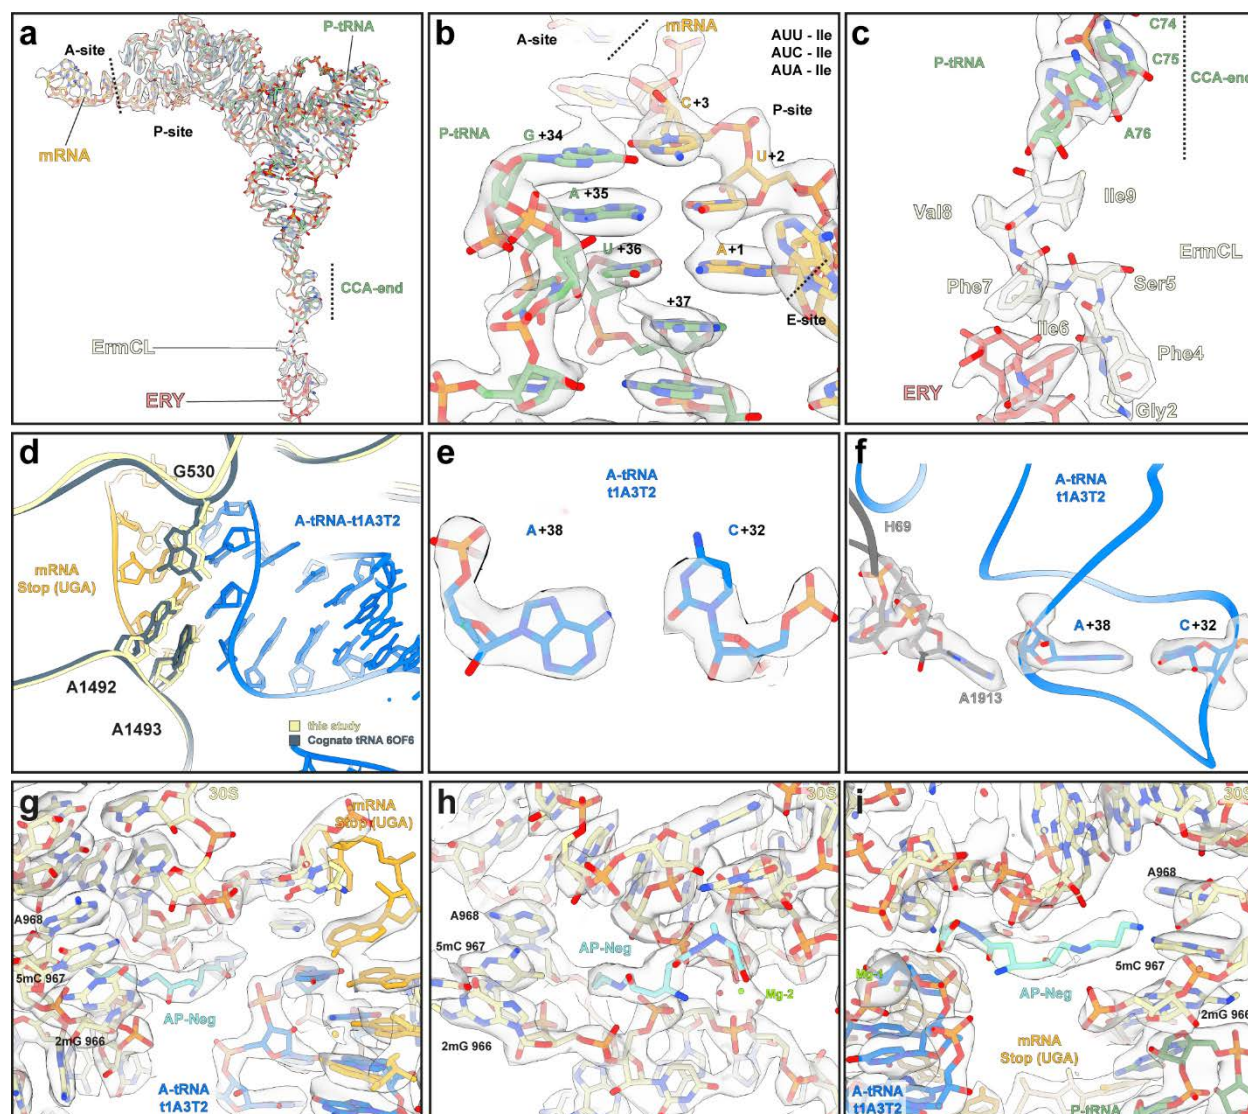

**Supplementary Fig. 10. Density images for the 70S-UGA complex.** (a) Isolated density (transparent grey) and model (green) for the ErmCL-peptidyl-tRNA in the P-site of the 70S-UGA complex. (b) Zoom showing the density (transparent grey) and model for the interaction between the Ile codon of the mRNA (orange) and the anticodon of the tRNA (green) in the P-site. (c) Zoom showing the density (transparent grey) and model for the CCA-end of the P-tRNA (green), ErmCL nascent chain (beige) and ERY (pink). (d) Conformation of G530, A1492 and A1493 (yellow) when t1A3T2 (blue) decodes UGA codon on mRNA (orange) on the ribosome compared with conformation of G530, A1492 and A1493 (dark green) when native tRNA<sup>Ala</sup>GGC decodes a cognate GCC codon. (e) Density (transparent grey) and models (blue) for the C32-A38 base pair within the anticodon stem of the t1A3T2 tRNA. (f) Engaged conformation of A1913 (grey with transparent density) from H69 of the 23S rRNA with C32-A38 base pair of t1A3T2 tRNA (blue with transparent density). (g-i) Close-up views with density (transparent grey) of AP-Neg (cyan)

bound to helices h31 and h34 of the 30S subunit (yellow) in close proximity to the t1A3T2 tRNA (blue) and UGA stop codon of the mRNA (orange) in the A-site.

### Supplementary Table 1. Sequences of the tRNA variants used in this study.

Predicted  $\Delta\Delta G^\circ$  values for substituting the T $\Psi$ C-stem base pairs 49-65, 50-64 and 51-63 of *E. coli* tRNA<sup>Phe</sup> for other base pairs to estimate binding affinities to elongation factor EF-Tu<sup>18</sup>. ACC, acceptor; AC, anticodon; D and T, D- and T $\Psi$ C-, respectively; s stem, l, loop. *P*(*S*) refers to the probability of each sequence to form a cloverleaf secondary structure assessed using the full equilibrium partition function (formula (16), ref.<sup>59</sup>). Nucleotide substitutions are highlighted: ACC (orange), D-s and D-l (light green), AC-s and AC-l (red), V-r (blue) and T-s and T-l (dark green).

| Name     | ACC-s   | D-s | D-l  | D-s       | AC-s | AC-l | AC-s  | V-r              | T-s   | T-l   | T-s   | ACC-s   | CCA   | $\Delta\Delta G^\circ$<br>[kcal/mol] | <i>P</i> ( <i>S</i> ) |     |      |      |
|----------|---------|-----|------|-----------|------|------|-------|------------------|-------|-------|-------|---------|-------|--------------------------------------|-----------------------|-----|------|------|
| Position | 1       | 8   | 10   | 14        | 22   | 26   | 27    | 32               | 39    | 44    | 49    | 54      | 61    | 66                                   | 73                    | 74  |      |      |
| t1       | GGGGCGG | UA  | GCUC | AGAAGGGA  | GAGC | A    | GCGGA | GACUAAA          | UCCGC | GAGAC | GGUCC | UUCGAUU | GGACC | CCGCUCC                              | A                     | CCA | -0.4 | 0.93 |
| t1       | GGGGCGG | UA  | GCUC | AGAAGGGA  | GAGC | A    | GCGGA | GAUCAA           | UCCGC | GAGAC | GGUCC | UUCGAUU | GGACC | CCGCUCC                              | A                     | CCA | -0.4 | 0.93 |
| t1A1     | GGGGCGG | UA  | GCUC | AGAAGGGA  | GAGC | A    | GCGGA | GU <u>CU</u> AAA | UCCGC | GAGAC | GGUCC | UUCGAUU | GGACC | CCGCUCC                              | A                     | CCA | -0.4 | 0.92 |
| t1A1     | GGGGCGG | UA  | GCUC | AGAAGGGA  | GAGC | A    | GCGGA | GU <u>U</u> CAA  | UCCGC | GAGAC | GGUCC | UUCGAUU | GGACC | CCGCUCC                              | A                     | CCA | -0.4 | 0.92 |
| t1A2     | GGGGCGG | UA  | GCUC | AGAAGGGA  | GAGC | A    | GCGGA | CU <u>CU</u> AGA | UCCGC | GAGAC | GGUCC | UUCGAUU | GGACC | CCGCUCC                              | A                     | CCA | -0.4 | 0.53 |
| t1A2     | GGGGCGG | UA  | GCUC | AGAAGGGA  | GAGC | A    | GCGGA | CU <u>U</u> CAGA | UCCGC | GAGAC | GGUCC | UUCGAUU | GGACC | CCGCUCC                              | A                     | CCA | -0.4 |      |
| t1A3     | GGGGCGG | UA  | GCUC | AGAAGGGA  | GAGC | A    | GCGGC | CU <u>CU</u> AGA | GCCGC | GAGAC | GGUCC | UUCGAUU | GGACC | CCGCUCC                              | A                     | CCA | -0.4 | 0.48 |
| t1A3     | GGGGCGG | UA  | GCUC | AGAAGGGA  | GAGC | A    | GCGGC | CU <u>U</u> CAGA | GCCGC | GAGAC | GGUCC | UUCGAUU | GGACC | CCGCUCC                              | A                     | CCA | -0.4 | 0.48 |
| t1A4     | GGGGCGG | UA  | GCUC | AGAAGGGA  | GAGC | A    | GCGGC | CU <u>U</u> CAA  | GCCGC | GAGAC | GGUCC | UUCGAUU | GGACC | CCGCUCC                              | A                     | CCA | -0.4 |      |
| t1A5     | GGGGCGG | UA  | GCUC | AGAAGGGA  | GAGC | A    | GCGGC | UU <u>U</u> CAA  | GCCGC | GAGAC | GGUCC | UUCGAUU | GGACC | CCGCUCC                              | A                     | CCA | -0.4 |      |
| t1A6     | GGGGCGG | UA  | GCUC | AGAAGGGA  | GAGC | A    | GCGGC | UU <u>U</u> CAAC | GCCGC | GAGAC | GGUCC | UUCGAUU | GGACC | CCGCUCC                              | A                     | CCA | -0.4 |      |
| t1A3T1   | GGGGCGG | UA  | GCUC | AGAAGGGA  | GAGC | A    | GCGGC | CU <u>U</u> CAGA | GCCGC | GAGAC | UGCC  | UUCGAUU | GGCA  | CCGCUCC                              | A                     | CCA | -0.7 |      |
| t1A3T2   | GGGGCGG | UA  | GCUC | AGAA GGG  | GAGC | A    | GCGGC | CU <u>U</u> CAGA | GCCGC | GAGAC | AGGG  | UUCGAUU | CCCCU | CCGCUCC                              | A                     | CCA | -1.5 |      |
| t1A3D    | GGGGCGG | UA  | GCGC | AGCCUGGUA | GCGC | A    | GCGGC | CU <u>U</u> CAGA | GCCGC | GAGAC | GGUCC | UUCGAUU | GGACC | CCGCUCC                              | A                     | CCA | -0.4 |      |
| t1A3DT1  | GGGGCGG | UA  | GCGC | AGCCUGGUA | GCGC | A    | GCGGC | CU <u>U</u> CAGA | GCCGC | GAGAC | UGCC  | UUCGAUU | GGCA  | CCGCUCC                              | A                     | CCA | -0.7 |      |
| t1A3DT2  | GGGGCGG | UA  | GCGC | AGCCUGGUA | GCGC | A    | GCGGC | CU <u>U</u> CAGA | GCCGC | GAGAC | AGGG  | UUCGAUU | CCCCU | CCGCUCC                              | A                     | CCA | -1.5 |      |



|             |         |    |      |           |      |   |       |         |       |                  |       |         |       |         |   |     |      |       |
|-------------|---------|----|------|-----------|------|---|-------|---------|-------|------------------|-------|---------|-------|---------|---|-----|------|-------|
| t1A3DT2 V1  | GGGGCGG | UA | GCGC | AGCCUGGUA | GCGC | A | GCGGC | CUUCAGA | GCCGC | UGGGGUCACUCCCCG  | AGGGG | UUCGAUU | CCCCU | CCGCUCC | A | CCA | -1.5 |       |
| t1A3DT2 V2  | GGGGCGG | UA | GCGC | AGCCUGGUA | GCGC | A | GCGGC | CUUCAGA | GCCGC | UGGGGUCCACUCCCCG | AGGGG | UUCGAUU | CCCCU | CCGCUCC | A | CCA | -1.5 |       |
| t1A3T2 V1   | GGGGCGG | UA | GCUC | AGAAGGGA  | GAGC | A | GCGGC | CUUCAGA | GCCGC | UGGGGUCACUCCCCG  | AGGGG | UUCGAUU | CCCCU | CCGCUCC | A | CCA | -1.5 |       |
| t1A3T2 V2   | GGGGCGG | UA | GCUC | AGAAGGGA  | GAGC | A | GCGGC | CUUCAGA | GCCGC | UGGGGUCCACUCCCCG | AGGGG | UUCGAUU | CCCCU | CCGCUCC | A | CCA | -1.5 |       |
| t2          | GGGGCUC | UA | GCUC | AGAAGGGA  | GAGC | A | GGGAC | GACUAAA | GUCCC | GAGAC            | GGCGC | UUCGAUU | GCGCC | GAGCUCC | A | CCA | -0.9 | 0.88  |
| t2AS1       | GGGGCGC | UA | GCUC | AGAAGGGA  | GAGC | A | GGGAC | GACUAAA | GUCCC | GAGAC            | GGCGC | UUCGAUU | GCGCC | GCGCUCC | A | CCA | -0.9 |       |
| t2AS2       | GGGGCUG | UA | GCUC | AGAAGGGA  | GAGC | A | GGGAC | GACUAAA | GUCCC | GAGAC            | GGCGC | UUCGAUU | GCGCC | CAGCUCC | A | CCA | -0.9 |       |
| t2AS2       | GGGGCUG | UA | GCUC | AGAAGGGA  | GAGC | A | GGGAC | GAUCAAA | GUCCC | GAGAC            | GGCGC | UUCGAUU | GCGCC | CAGCUCC | A | CCA | -0.9 |       |
| t2AS3       | GGGGCGG | UA | GCUC | AGAAGGGA  | GAGC | A | GGGAC | GACUAAA | GUCCC | GAGAC            | GGCGC | UUCGAUU | GCGCC | CCGCUCC | A | CCA | -0.9 |       |
| t2AS3       | GGGGCGG | UA | GCUC | AGAAGGGA  | GAGC | A | GGGAC | GAUCAAA | GUCCC | GAGAC            | GGCGC | UUCGAUU | GCGCC | CCGCUCC | A | CCA | -0.9 |       |
| t2AS2 A3    | GGGGCUG | UA | GCUC | AGAAGGGA  | GAGC | A | GGGAC | CUUCAGA | GUCCC | GAGAC            | GGCGC | UUCGAUU | GCGCC | CAGCUCC | A | CCA | -0.9 |       |
| t2AS2 T2    | GGGGCUG | UA | GCUC | AGAAGGGA  | GAGC | A | GGGAC | GAUCAAA | GUCCC | GAGAC            | AGGGG | UUCGAUU | CCCCU | CAGCUCC | A | CCA | -1.5 |       |
| t2AS2 D     | GGGGCUG | UA | GCGC | AGCCUGGUA | GCGC | A | GGGAC | GAUCAAA | GUCCC | GAGAC            | GGCGC | UUCGAUU | GCGCC | CAGCUCC | A | CCA | -0.9 |       |
| t2AS2 A3T2  | GGGGCUG | UA | GCUC | AGAAGGGA  | GAGC | A | GGGAC | CUUCAGA | GUCCC | GAGAC            | AGGGG | UUCGAUU | CCCCU | CAGCUCC | A | CCA | -1.5 |       |
| t2AS2 A3D   | GGGGCUG | UA | GCGC | AGCCUGGUA | GCGC | A | GGGAC | CUUCACU | GUCCC | GAGAC            | GGCGC | UUCGAUU | GCGCC | CAGCUCC | A | CCA | -0.9 |       |
| t2AS2 A3DT2 | GGGGCUG | UA | GCGC | AGCCUGGUA | GCGC | A | GGGAC | CUUCACU | GUCCC | GAGAC            | AGGGG | UUCGAUU | CCCCU | CAGCUCC | A | CCA | -1.5 |       |
| t3          | GGGGCCC | UA | GCUC | AGAAAGGA  | GAGC | A | GGCAG | GACUAAA | CUGCC | GAGAA            | GCAGC | GACAUAA | GUCGC | GGGCUCC | A | CCA | -0.5 | 0.97  |
| t4          | GGGGCCC | UA | GCUC | AGAAAGGA  | GAGC | A | GGCAG | GACUAAA | CUGCC | GAGAA            | GCCGG | GACUAAA | CCGGC | GGGCUCC | A | CCA | -1.1 | 0.94  |
| t5          | GGGGCGC | UA | GCUC | AUAAGGA   | GAGC | A | GGAGC | GACUAAA | GCUCC | GAGAA            | GUCGC | GACAUAA | GCGAC | GCGCUCC | A | CCA | -0.9 | 0.94  |
| Ala (GGC)   | GGGGCUA | UA | GCUC | AGCUGGGA  | GAGC | G | CUUGC | AUGGCAU | GCAAG | AGGUC            | AGCGG | UUCGAUC | CCGCU | UAGCUCC | A | CCA | -1.0 | 0.09  |
| Ala (CUA)   | GGGGCUA | UA | GCUC | AGCUGGGA  | GAGC | G | CUUGC | AUCUAAU | GCAAG | AGGUC            | AGCGG | UUCGAUC | CCGCU | UAGCUCC | A | CCA | -1.0 |       |
| Ala (UGC)   | GGGGCUA | UA | GCUC | AGCUGGGA  | GAGC | G | CCUGC | UUUGCAC | GCAGG | AGGUC            | UGCGG | UUCGAUC | CCGCA | UAGCUCC | A | CCA | -0.7 | 0.005 |

**Supplementary Table 2. Cryo-EM data collection, refinement and validation statistics**

|                                                     | t1A3T2 70S<br>EMDB-12035)<br>(PDB 7B5K) |
|-----------------------------------------------------|-----------------------------------------|
| <b>Data collection and processing</b>               |                                         |
| Microscope                                          | Talos Arctica                           |
| Magnification                                       | 150,000                                 |
| Voltage (kV)                                        | 200                                     |
| Electron exposure (e <sup>-</sup> /Å <sup>2</sup> ) | 30                                      |
| Defocus range (µm)                                  | -0.8 to -3                              |
| Pixel size (Å)                                      | 0.96                                    |
| Symmetry imposed                                    | C1                                      |
| Initial particle images (no.)                       | 79,477                                  |
| Final particle images (no.)                         | 53,115                                  |
| Map resolution (Å)                                  | 2.9                                     |
| FSC threshold                                       | 0.143                                   |
| Map resolution range (Å)                            | 2.5-7.5                                 |
| Detector                                            | Falcon 3                                |
| <b>Refinement</b>                                   |                                         |
| Initial model used (PDB code)                       | 6TBV                                    |
| Map sharpening <i>B</i> factor (Å <sup>2</sup> )    | -46.13                                  |
| Model composition                                   |                                         |
| Non-hydrogen atoms                                  | 148,612                                 |
| Protein residues                                    | 5,684                                   |
| RNA bases                                           | 4,790                                   |
| Ligands                                             | Ery, 2x AP-NEG                          |
| R.m.s. deviations                                   |                                         |
| Bond lengths (Å)                                    | 0.007                                   |
| Bond angles (°)                                     | 1.037                                   |
| Validation                                          |                                         |
| MolProbity score                                    | 1.84                                    |
| Clashscore                                          | 4                                       |
| Poor rotamers (%)                                   | 0.45                                    |
| Ramachandran plot                                   |                                         |
| Favored (%)                                         | 95.95                                   |
| Allowed (%)                                         | 3.95                                    |
| Outliers (%)                                        | 0.11                                    |

**Supplementary Table 3: Cloning primers, primers used for in vitro T7-based transcription of tRNA variants and oligonucleotides for probing.** fw, forward primer, rev, reverse primer.

| Name                                                                 | Sequence (5'-3')                                                            |
|----------------------------------------------------------------------|-----------------------------------------------------------------------------|
| <b>Primers for T7 transcription of the tRNA variants<sup>a</sup></b> |                                                                             |
| t1_fw                                                                | TAATACGACTCACTATAGGGGCGGTAGCTCAGAAGGGAGAGCAGCGGAGACTAAATCC                  |
| t1_rev                                                               | TGGTGGAGCGGGGTCCAATCGAAGGACCGTCTCGCGGATTTAGTCTCCGCTGCTCTCC                  |
| t1A1_fw                                                              | TAATACGACTCACTATAGGGGCGGTAGCTCAGAAGGGAGAGCAGCGG                             |
| t1A1_rev                                                             | TGGTGGAGCGGGGTCCAATCGAAGGACCGTCTCGCGGATTTAGACTCCGCTGCTCTCCCTTCTG            |
| t1A2_fw                                                              | TAATACGACTCACTATAGGGGCGGTAGCTCAGAAGGGAGAGCAGCGG                             |
| t1A2_rev                                                             | TGGTGGAGCGGGGTCCAATCGAAGGACCGTCTCGCGGATCTAGAGTCCGCTGCTCTCCCTTCTG            |
| t1A3_fw                                                              | TAATACGACTCACTATAGGGGCGGTAGCTCAGAAGGGAGAGCAGCGGCTCTAGAGCC                   |
| t1A3_rev                                                             | TGGTGGAGCGGGGTCCAATCGAAGGACCGTCTCGCGGCTCTAGAGGCCGCTGCTC                     |
| t2_fw                                                                | TAATACGACTCACTATAGGGGCTCTAGCTCAGAAGGGAGAGCAGGGACGACTAAAGTCC                 |
| t2_rev                                                               | TGGTGGAGCTCGGCGCAATCGAAGCGCGTCTCGGGACTTTAGTCGTCCTGCTCTCC                    |
| t2AS1_fw                                                             | TAATACGACTCACTATAGGGGCGGTAGCTCAGAAGGGAGAGCAGGGACGACTAAAGTCC                 |
| t2AS1_rev                                                            | TGGTGGAGCGCGGCGCAATCGAAGCGCGTCTCGGGACTTTAGTCGTCCTGCTCTCC                    |
| t2AS2_fw                                                             | TAATACGACTCACTATAGGGGCTCTAGCTCAGAAGGGAGAGCAGGGACGACTAAAGTCC                 |
| t2AS2_rev                                                            | TGGTGGAGCTGGGCGCAATCGAAGCGCGTCTCGGGACTTTAGTCGTCCTGCTCTCC                    |
| t2AS3_fw                                                             | TAATACGACTCACTATAGGGGCGGTAGCTCAGAAGGGAGAGCAGGGACGACTAAAGTCC                 |
| t2AS3_rev                                                            | TGGTGGAGCGGGGCGCAATCGAAGCGCGTCTCGGGACTTTAGTCGTCCTGCTCTCC                    |
| t3_fw                                                                | TAATACGACTCACTATAGGGGCCCTAGCTCAGAAAGGAGAGCAGGCAGGACTAAAC                    |
| t3_rev                                                               | TGGTGGAGCCCGCAGCTTATGTGCTGCTTCTCGGCAGTTTGTCTGCTCTCTC                        |
| t4_fw                                                                | TAATACGACTCACTATAGGGGCCCTAGCTCAGAAAGGAGAGCAGGCAGGACTAAAC                    |
| t4_rev                                                               | TGGTGGAGCCCGCGGTTTGTCTCCGCTTCTCGGCAGTTTGTCTGCTCTCTC                         |
| t5_fw                                                                | TAATACGACTCACTATAGGGGCGGTAGCTCAATAAGGAGAGCAGGAGCGACTAAAG                    |
| t5_rev                                                               | TGGTGGAGCGCGTCTGCTTATGTGCGGACTTCTCGGAGCTTTAGTCGCTCTGCTCTC                   |
| Ala(GGC)_fw                                                          | TAATACGACTCACTATAGGGGCTATAGCTCAGCTGGGAGAGCGCTTGCATGGCATGCAAG                |
| Ala(GGC)_rev                                                         | TGGTGGAGCTAAGCGGGATCGAACCCTGACCTCTTGCATGCAAGCGCTC                           |
| Ala(CUA)_fw                                                          | TAATACGACTCACTATAGGGGCTATAGCTCAGCTGGGAGAGCGCTTGCATCTAATGCAAG                |
| Ala(CUA)_rev                                                         | TGGTGGAGCTAAGCGGGATCGAACCCTGACCTCTTGCATTAGATGCAAGCGCTC                      |
| Ala(UGC)_fw                                                          | TAATACGACTCACTATAGGGGCTATAGCTCAGCTGGGAGAGCGCTTGTTCACGCAG                    |
| Ala(UGC)_rev                                                         | TGGTGGAGCTATGCGGGATCGAACCCTGACCTCTGCGTGCATGCAAGCGGCTCTC                     |
| <b>Oligonucleotide for CCA-end probing</b>                           |                                                                             |
| CCA_probe                                                            | pCGCACUGCdTdTxdTdTdGdCdAdGdTdGdCdGdTdGdGdN, X= Cy3-dT                       |
| <b>Primers for tRNA variants cloning</b>                             |                                                                             |
| t1_fw <sup>b</sup>                                                   | CGAGACGGTCTTCGATTGGACCCCGCTCCACCAATCCTTAGCGAAAGCTAAGGATTTTTTTTAC            |
| t1_rev <sup>b</sup>                                                  | CGGATTTAGTCTCCGCTGCTCTCCCTTCTGAGCTACCGCCCAGCGTTACAAGTATTACACAAAGTTTTTTATG   |
| t1_fw <sup>c</sup>                                                   | TAACCGGAATTCGGGGCGGTAGCTCAGAAG                                              |
| t1_rev <sup>c</sup>                                                  | CAATGCATTGGTTCTGCAGTGGTGGAGCGGGGTC                                          |
| t1_fw <sup>d</sup>                                                   | CAGAAGGGAGAGCAGCGGAGATCAAATCCGCGAGACGGTCTCTCC                               |
| t1_rev <sup>d</sup>                                                  | CGAAGGACCGTCTCGCGGATTTGATCTCCGCTGCTCTCCCTTCTG                               |
| t1A1_fw                                                              | CAGAAGGGAGAGCAGCGGAGTTCAAATCCGCGAGACGGTCTCTCC                               |
| t1A1_rev                                                             | CGAAGGACCGTCTCGCGGATTTGAACTCCGCTGCTCTCCCTTCTG                               |
| t1A2_fw                                                              | CAGAAGGGAGAGCAGCGGACTTCAGATCCGCGAGACGGTCTCTCC                               |
| t1A2_rev                                                             | CGAAGGACCGTCTCGCGGATCTGAAGTCCGCTGCTCTCCCTTCTG                               |
| t1A3_fw                                                              | CAGAAGGGAGAGCAGCGGCTTCAGAGCCGCGAGACGGTCC                                    |
| t1A3_rev                                                             | GGACCGTCTCGCGGCTCTGAAGGCCGCTGCTCTCCCTTCTG                                   |
| t1A4_fw                                                              | GCGGCCTTCAAAGCCGCGAG                                                        |
| t1A4_rev                                                             | CTCGCGGCTTTGAAAGCCGC                                                        |
| t1A5_fw                                                              | GAGCAGCGGCTTTCAAAGCCGC                                                      |
| t1A5_rev                                                             | GCGGCTTTGAAAGCCGCTGCTC                                                      |
| t1A6_fw                                                              | GCGGCTTTCAAAGCCGCGAGAC                                                      |
| t1A6_rev                                                             | GTCTCGCGGCTTTGAAAGCCGC                                                      |
| t1A3T1_fw                                                            | GCCGCGAGACTGCCCTTCGATTGGGCACCGCTCCACCACTGCAGATCCTTAGCGAAAGCTAAG             |
| t1A3T1_rev                                                           | TCTGAAGGCCGCTGCTCTCCCTTCTGAGCTACCGCCCAGTTCAGCGTTACAAGTATTACACAAAGTTTTTTATG  |
| t1A3T2_fw                                                            | GCCGCGAGACAGGGGTTTCGATTCCCTCCGCTCCACCACTGCAGATCCTTAGCGAAAGCTAAG             |
| t1A3T2_rev                                                           | TCTGAAGGCCGCTGCTCTCCCTTCTGAGCTACCGCCCAGTTCAGCGTTACAAGTATTACACAAAGTTTTTTATG  |
| t1A3D_fw                                                             | GCCGCGAGACGGTCTTCGATTGGACCCGCTCCACCACTGCAGATCCTTAGCGAAAGCTAAG               |
| t1A3D_rev                                                            | TCTGAAGGCCGCTGCTGCTACCAGGTGCGCTACCGCCCAGTTCAGCGTTACAAGTATTACACAAAGTTTTTTATG |
| t1A3DT1_fw                                                           | GCCGCGAGACTGCCCTTCGATTGGGCACCGCTCCACCACTGCAGATCCTTAGCGAAAGCTAAG             |
| t1A3DT1_rev                                                          | TCTGAAGGCCGCTGCTGCTACCAGGTGCGCTACCGCCCAGTTCAGCGTTACAAGTATTACACAAAGTTTTTTATG |
| t1A3DT2_fw                                                           | GCCGCGAGACAGGGGTTTCGATTCCCTCCGCTCCACCACTGCAGATCCTTAGCGAAAGCTAAG             |
| t1A3DT2_rev                                                          | TCTGAAGGCCGCTGCTGCTACCAGGTGCGCTACCGCCCAGTTCAGCGTTACAAGTATTACACAAAGTTTTTTATG |
| t1A3DT2 V1_fw                                                        | ACTCCCCGAGGGGTTTCGATTCCCTTCC                                                |
| t1A3DT2 V1_rev                                                       | GACCCAGCGGCTCTGAAGGCCG                                                      |
| t1A3DT2 V2_fw                                                        | ACTCCCCGAGGGGTTTCGATTCCCTTCC                                                |
| t1A3DT2 V2_rev                                                       | GGACCCAGCGGCTCTGAAGGCCG                                                     |
| t1A3T2 V1_fw                                                         | ACTCCCCGAGGGGTTTCGATTCCCTTCC                                                |
| t1A3T2 V1_rev                                                        | GACCCAGCGGCTCTGAAGGCCG                                                      |
| t1A3T2 V2_fw                                                         | ACTCCCCGAGGGGTTTCGATTCCCTTCC                                                |

|                 |                                                                              |
|-----------------|------------------------------------------------------------------------------|
| t1A3T2 V2_rev   | GGACCCAGCGGCTCTGAAGGCCG                                                      |
| t2AS2_fw        | CGATCAAAGTCCCAGACGGCGCTTCGATTGCGCCAGCTCCACCACTGCAGATCCTTAGCGAAAGCTAAG        |
| t2AS2_rev       | TCCCTGCTCTCCCTTCTGAGCTACAGCCCCGAATTCAGCGTTACAAGTATTACACAAAAG                 |
| t2AS2 A3_fw     | CCTTCAGAGTCCCAGACGGCGCTTCGATTGCGCCAGCTCCACCACTGCAGATCCTTAGCGAAAGCTAAG        |
| t2AS2 A3_rev    | TCCCTGCTCTCCCTTCTGAGCTACAGCCCCGAATTCAGCGTTACAAGTATTACACAAAAG                 |
| t2AS2 T2_fw     | CGATCAAAGTCCCAGACAGGGGTTTCGATTCCCTCAGCTCCACCACTGCAGATCCTTAGCGAAAGCTAAG       |
| t2AS2 T2_rev    | TCCCTGCTCTCCCTTCTGAGCTACAGCCCCGAATTCAGCGTTACAAGTATTACACAAAAG                 |
| t2AS2 D_fw      | CGATCAAAGTCCCAGACGGCGCTTCGATTGCGCCAGCTCCACCACTGCAGATCCTTAGCGAAAGCTAAG        |
| t2AS2 D_rev     | TCCCTGCGCTACCAGGCTGCGCTACAGCCCCGAATTCAGCGTTACAAGTATTACACAAAAG                |
| t2AS2 A3T2_fw   | CCTTCAGAGTCCCAGACAGGGGTTTCGATTCCCTCAGCTCCACCACTGCAGATCCTTAGCGAAAGCTAAG       |
| t2AS2 A3T2_rev  | TCCCTGCTCTCCCTTCTGAGCTACAGCCCCGAATTCAGCGTTACAAGTATTACACAAAAG                 |
| t2AS2 A3D_fw    | CCTTCAGAGTCCCAGACGGCGCTTCGATTGCGCCAGCTCCACCACTGCAGATCCTTAGCGAAAGCTAAG        |
| t2AS2 A3D_rev   | TCCCTGCGCTACCAGGCTGCGCTACAGCCCCGAATTCAGCGTTACAAGTATTACACAAAAG                |
| t2AS2 A3DT2_fw  | CCTTCAGAGTCCCAGACAGGGGTTTCGATTCCCTCAGCTCCACCACTGCAGATCCTTAGCGAAAGCTAAG       |
| t2AS2 A3DT2_rev | TCCCTGCGCTACCAGGCTGCGCTACAGCCCCGAATTCAGCGTTACAAGTATTACACAAAAG                |
| t2AS3_fw        | CGATCAAAGTCCCAGACGGCGCTTCGATTGCGCCCGCTCCACCACTGCAGATCCTTAGCGAAAGCTAAG        |
| t2AS3_rev       | TCCCTGCTCTCCCTTCTGAGCTACAGCCCCGAATTCAGCGTTACAAGTATTACACAAAAG                 |
| Ala(GGC)_fw     | TTGCATGGCATGCAAGAGGTTCAGCGGTTTCGATCCCGCTTAGCTCCACCACTGCAGATCCTTAGCGAAAGCTAAG |
| Ala(GGC)_rev    | GCGCTCTCCAGCTGAGCTATAGCCCCGAATTCAGCGTTACAAGTATTACACAAAAG                     |
| Ala(UGC)_fw     | CTGCTTTGCACGCAGGAGGTCTGCGGTTTCGATCCCGCATAGCTCCACCACTGCAGATCCTTAGCGAAAGCTAAG  |
| Ala(UGC)_rev    | GCGCTCTCCAGCTGAGCTATAGCCCCGAATTCAGCGTTACAAGTATTACACAAAAG                     |

### Primers for GFP variants cloning

|                      |                                         |
|----------------------|-----------------------------------------|
| GFP_fw <sup>e</sup>  | TAACGCTCTAGATTAACTTTAAGAAGGAGATATACCATG |
| GFP_rev <sup>e</sup> | TGCCCAAGCTTTTACTTGTACAGCTCGTCCAT        |
| GFP(UAA)_fw          | GCCACAAGTTCTAAGTGTCGG                   |
| GFP(UAA)_rev         | CGGACACTTAGAACTTGTGGC                   |
| GFP(UAG)_fw          | GCCACAAGTTCTAGGTGTCC                    |
| GFP(UAG)_rev         | GGACACTTAGAACTTGTGGC                    |
| GFP(UGA)_fw          | GCCACAAGTTCTGAGTGTCC                    |
| GFP(UGA)_rev         | GGACACTCAGAACTTGTGGC                    |
| GFP_6xHis_fw         | CACCATCACTAAAAGCTTGGCTGTTTTGGC          |
| GFP_6xHis_rev        | ATGGTGATGCTTGTACAGCTCGTCCATGC           |

### Oligonucleotide for affinity purification of t1A3T2

t1A3T2 probe XTGGTGGAGCGGAGGGGAATCGAACCCCTGTCTCGCGGCTCTGAAG, X= Biotin

<sup>a</sup>T7 promoter sequence underlined

<sup>b</sup>t1(CUA) was cloned into pRIL vector, <sup>c</sup>subcloned into pBST NAV2, and <sup>d</sup>converted to t1(UCA)

<sup>e</sup>GFP was subcloned into pBAD33
